# Supplementary material for: Killers 2.0: NK cell therapies at the forefront of cancer control
Source: JCI journal article supplement (doi:10.1172/jci129338), 2019-09-02
Supplement: sd1 [file 1]

| NCT ID      | Study Title                                                                                                                     | Status             | Conditions <sup>1</sup>                                                         | Phase     | (Expected) Completion | Study Locations |
|-------------|---------------------------------------------------------------------------------------------------------------------------------|--------------------|---------------------------------------------------------------------------------|-----------|-----------------------|-----------------|
| NCT03206073 | A Phase I/II Study of Pexa-Vec Oncolytic Virus in Combination With Immune Checkpoint Inhibition in Refractory Colorectal Cancer | Recruiting         | Colorectal Cancer, Colorectal Carcinoma, Colorectal Adenocarcinoma              | Phase 1/2 | December 31, 2020     | United States   |
| NCT03294486 | Safety and Efficacy of the ONCOlytic VIRus Armed for Local Chemotherapy, TG6002/5-FC, in Recurrent Glioblastoma Patients        | Recruiting         | Glioblastoma, Brain Cancer                                                      | Phase 1/2 | May 1, 2019           | France          |
| NCT03004183 | SBRT and Oncolytic Virus Therapy Before Pembrolizumab for Metastatic TNBC and NSCLC                                             | Recruiting         | Metastatic Non-small Cell Lung Cancer, Metastatic Triple-negative Breast Cancer | Phase 2   | May 1, 2022           | United States   |
| NCT03954067 | A Study of an Intratumoral Oncolytic Virus in Patients With Advanced Metastatic Solid Tumors                                    | Not yet recruiting | Metastatic Cancer, Solid Tumors, Advanced Cancer                                | Phase 1   | March 1, 2022         |                 |
| NCT02705196 | LOAd703 Oncolytic Virus Therapy for Pancreatic Cancer                                                                           | Recruiting         | Pancreatic Cancer                                                               | Phase 1/2 | November 1, 2019      | United States   |
| NCT00794131 | Safety Study of GL-ONC1, an Oncolytic Virus, in Patients With Advanced Solid Tumors                                             | Completed          | Advanced Cancers (Solid Tumors)                                                 | Phase 1   | November 1, 2015      | United Kingdom  |
| NCT02365818 | Safety and Efficacy of CG0070 Oncolytic Virus Regimen for High Grade NMIBC After BCG Failure                                    | Completed          | Bladder Cancer                                                                  | Phase 2   | August 1, 2018        | United States   |

|                 |                                                                                                                                                                                              |                        |                                                         |         |                   |                |
|-----------------|----------------------------------------------------------------------------------------------------------------------------------------------------------------------------------------------|------------------------|---------------------------------------------------------|---------|-------------------|----------------|
| NCT004<br>08590 | Recombinant Measles Virus Vaccine Therapy and Oncolytic Virus Therapy in Treating Patients With Progressive, Recurrent, or Refractory Ovarian Epithelial Cancer or Primary Peritoneal Cancer | Completed              | Ovarian Cancer, Primary Peritoneal Cavity Cancer        | Phase 1 | August 1, 2012    | United States  |
| NCT038<br>66525 | OH2 Oncolytic Viral Therapy in Solid Tumors                                                                                                                                                  | Recruiting             | Solid Tumor, Gastrointestinal Cancer                    | Phase 1 | December 31, 2020 | China          |
| NCT031<br>90824 | Evaluate Efficacy, Immunological Response of Intratumoral/Intralesional Oncolytic Virus (OBP-301) in Metastatic Melanoma                                                                     | Active, not recruiting | Melanoma Stage III, Melanoma Stage IV                   | Phase 2 | June 24, 2021     | United States  |
| NCT039<br>16510 | Chemoradiation With Enadenotucirev as a Radiosensitizer in Locally Advanced Rectal Cancer                                                                                                    | Not yet recruiting     | Locally Advanced Rectal Cancer                          | Phase 1 | March 1, 2022     | United Kingdom |
| NCT037<br>14334 | DNX-2440 Oncolytic Adenovirus for Recurrent Glioblastoma                                                                                                                                     | Recruiting             | Glioblastoma, Glioblastoma, Adult                       | Phase 1 | April 16, 2022    | Spain          |
| NCT024<br>28036 | A Study of TBI-1401(HF10) in Patients With Solid Tumors With Superficial Lesions                                                                                                             | Completed              | Solid Tumor                                             | Phase 1 | October 1, 2016   | Japan          |
| NCT032<br>52808 | Phase I Study of TBI-1401(HF10) Plus Chemotherapy in Japanese Patients With Unresectable Pancreatic Cancer.                                                                                  | Active, not recruiting | Pancreatic Cancer Stage III, Pancreatic Cancer Stage IV | Phase 1 | May 31, 2020      | Japan          |
| NCT031<br>53085 | A Study of Combination With TBI-1401(HF10) and Ipilimumab in Japanese Patients With Unresectable or Metastatic Melanoma                                                                      | Completed              | Melanoma Stage III, Melanoma Stage IV                   | Phase 2 | June 30, 2018     | Japan          |
| NCT027<br>14374 | Safety and Effect of GL-ONC1 Administered IV Prior to Surgery to                                                                                                                             | Active, not recruiting | Solid Organ Cancers                                     | Phase 1 | March 1, 2019     | United States  |

|             |                                                                                                                       |                    |                                                                                     |           |                   |                |
|-------------|-----------------------------------------------------------------------------------------------------------------------|--------------------|-------------------------------------------------------------------------------------|-----------|-------------------|----------------|
|             | Patients With Solid Organ Cancers Undergoing Surgery                                                                  |                    |                                                                                     |           |                   |                |
| NCT02272855 | A Study of Combination Treatment With HF10 and Ipilimumab in Patients With Unresectable or Metastatic Melanoma        | Completed          | Malignant Melanoma                                                                  | Phase 2   | October 1, 2016   | United States  |
| NCT03605719 | Dexamethasone, Carfilzomib, & Nivolumab With Reovirus for Relapsed/Refractory Multiple Myeloma                        | Recruiting         | Recurrent Plasma Cell Myeloma                                                       | Phase 1   | October 31, 2021  | United States  |
| NCT00028158 | Safety and Effectiveness Study of G207, a Tumor-Killing Virus, in Patients With Recurrent Brain Cancer                | Completed          | Glioma, Astrocytoma, Glioblastoma                                                   | Phase 1/2 |                   |                |
| NCT03740256 | Binary Oncolytic Adenovirus in Combination With HER2-Specific CAR VST, Advanced HER2 Positive Solid Tumors (VISTA)    | Not yet recruiting | Bladder Cancer, Head and Neck Squamous Cell Carcinoma, Cancer of the Salivary Gland | Phase 1   | January 1, 2023   |                |
| NCT03152318 | A Study of the Treatment of Recurrent Malignant Glioma With rQNestin34.5v.2                                           | Recruiting         | Malignant Glioma of Brain, Astrocytoma, Malignant Astrocytoma                       | Phase 1   | July 1, 2021      | United States  |
| NCT01721018 | Intrpleural Administration of HSV1716 to Treat Patients With Malignant Pleural Mesothelioma.                          | Completed          | Malignant Pleural Mesothelioma                                                      | Phase 1/2 | November 14, 2016 | United Kingdom |
| NCT00528684 | Safety and Efficacy Study of REOLYSIN® in the Treatment of Recurrent Malignant Gliomas                                | Completed          | Malignant Glioma                                                                    | Phase 1   | April 1, 2010     | United States  |
| NCT02977156 | Immunization Strategy With Intratumoral Injections of Pexa-Vec With Ipilimumab in Metastatic / Advanced Solid Tumors. | Recruiting         | Metastatic Tumor, Advanced Tumor                                                    | Phase 1   | December 1, 2019  | France         |

|                 |                                                                                                                   |                        |                                                                                             |           |                  |                |
|-----------------|-------------------------------------------------------------------------------------------------------------------|------------------------|---------------------------------------------------------------------------------------------|-----------|------------------|----------------|
| NCT020<br>53220 | Mechanism of Action Trial of ColoAd1                                                                              | Completed              | Resectable Colon Cancer, Resectable Non-small Cell Lung Cancer, Resectable Bladder Cancer   | Phase 1   | April 1, 2015    | Spain          |
| NCT021<br>97169 | DNX-2401 With Interferon Gamma (IFN- $\gamma$ ) for Recurrent Glioblastoma or Gliosarcoma Brain Tumors            | Completed              | Glioblastoma or Gliosarcoma                                                                 | Phase 1   | March 15, 2018   | United States  |
| NCT020<br>28442 | Phase I / II Study of Enadenotucirev by Sub-acute Fractionated IV Dosing in Cancer Patients                       | Completed              | Solid Tumours of Epithelial Origin, Metastatic Colorectal Cancer, Metastatic Bladder Cancer | Phase 1/2 | April 29, 2016   | Spain          |
| NCT020<br>28117 | Phase I / Dose Expansion Study of Enadenotucirev in Ovarian Cancer Patients                                       | Recruiting             | Recurrent Platinum Resistant Ovarian Cancer                                                 | Phase 1   | August 1, 2019   | United Kingdom |
| NCT027<br>79855 | Talimogene Laherparepvec in Combination With Neoadjuvant Chemotherapy in Triple Negative Breast Cancer            | Recruiting             | Breast Cancer, Ductal Carcinoma, Invasive Breast Carcinoma                                  | Phase 1/2 | August 31, 2021  | United States  |
| NCT009<br>31931 | HSV1716 in Patients With Non-Central Nervous System (Non-CNS) Solid Tumors                                        | Completed              | Rhabdomyosarcoma, Osteosarcoma, Ewing Sarcoma                                               | Phase 1   | March 19, 2018   | United States  |
| NCT037<br>47744 | Intratumoral Injection of Autologous CD1c (BDCA-1)+ Myeloid Dendritic Cells Plus Talimogene Laherparepvec (T-VEC) | Recruiting             | Melanoma                                                                                    | Phase 1   | October 1, 2019  | Belgium        |
| NCT034<br>08587 | CAVATAK <sup>®</sup> and Ipilimumab in Uveal Melanoma Metastatic to the Liver (VLA-024 CLEVER)                    | Active, not recruiting | Uveal Melanoma, Liver Metastases                                                            | Phase 1   | January 14, 2020 | United States  |

|                 |                                                                                                                  |                        |                                                                           |           |                  |                |
|-----------------|------------------------------------------------------------------------------------------------------------------|------------------------|---------------------------------------------------------------------------|-----------|------------------|----------------|
| NCT012<br>27551 | A Study of Intratumoral CAVATAKâ„¢ in Patients With Stage IIIc and Stage IV Malignant Melanoma (VLA-007 CALM )   | Completed              | Malignant Melanoma                                                        | Phase 2   | July 15, 2015    | United States  |
| NCT004<br>29312 | A Study of Recombinant Vaccinia Virus to Treat Malignant Melanoma                                                | Completed              | Melanoma                                                                  | Phase 1/2 | February 1, 2008 | United States  |
| NCT015<br>98129 | ONCOS-102 (Previously CGTG-102) for Therapy of Advanced Cancers                                                  | Completed              | Malignant Solid Tumour                                                    | Phase 1   | October 1, 2013  | Finland        |
| NCT004<br>38009 | A Safety Study of Two Intratumoural Doses of Coxsackievirus Type A21 in Melanoma Patients (PSX-X03)              | Completed              | Stage IV Melanoma                                                         | Phase 1   | August 28, 2009  | Australia      |
| NCT013<br>01430 | Parvovirus H-1 (ParvOryx) in Patients With Progressive Primary or Recurrent Glioblastoma Multiforme.             | Completed              | Glioblastoma Multiforme                                                   | Phase 1/2 | May 1, 2015      | Germany        |
| NCT027<br>98406 | Combination Adenovirus + Pembrolizumab to Trigger Immune Virus Effects                                           | Active, not recruiting | Brain Cancer, Brain Neoplasm, Glioma                                      | Phase 2   | December 1, 2020 | United States  |
| NCT038<br>89275 | A Study of MEDI5395 in Combination With Durvalumab in Subjects With Select Advanced Solid Tumors                 | Not yet recruiting     | Advanced Solid Tumors                                                     | Phase 1   | March 27, 2025   | United Kingdom |
| NCT036<br>18953 | This is a Trial of MG1-E6E7 With Ad-E6E7 and Atezolizumab in Patients With HPV Associated Cancers                | Active, not recruiting | HPV-Associated Cancers                                                    | Phase 1   | June 1, 2020     | International  |
| NCT005<br>03295 | Safety and Efficacy Study of REOLYSINÂ® in the Treatment of Bone and Soft Tissue Sarcomas Metastatic to the Lung | Completed              | Osteosarcoma, Ewing Sarcoma Family Tumors, Malignant Fibrous Histiocytoma | Phase 2   | February 1, 2011 | United States  |

|                 |                                                                                                                                          |                        |                                                                                                               |           |                   |               |
|-----------------|------------------------------------------------------------------------------------------------------------------------------------------|------------------------|---------------------------------------------------------------------------------------------------------------|-----------|-------------------|---------------|
| NCT020<br>62827 | Genetically Engineered HSV-1 Phase 1 Study for the Treatment of Recurrent Malignant Glioma                                               | Recruiting             | Recurrent Glioblastoma Multiforme, Progressive Glioblastoma Multiforme, Anaplastic Astrocytoma or Gliosarcoma | Phase 1   | September 1, 2019 | United States |
| NCT002<br>89016 | A Study of Talimogene Laherparepvec in Stage IIIc and Stage IV Malignant Melanoma                                                        | Completed              | Melanoma                                                                                                      | Phase 2   | December 1, 2008  | International |
| NCT014<br>43260 | A Study of GL-ONC1, an Oncolytic Vaccinia Virus, in Patients With Advanced Peritoneal Carcinomatosis                                     | Completed              | Peritoneal Carcinomatosis                                                                                     | Phase 1/2 | September 1, 2014 | Germany       |
| NCT037<br>73744 | MG1-MAGEA3 With Ad-MAGEA3 and Pembrolizumab in Patients With Previously Treated Metastatic Melanoma or Cutaneous Squamous Cell Carcinoma | Not yet recruiting     | Metastatic Melanoma, Squamous Cell Skin Carcinoma                                                             | Phase 1   | October 30, 2020  |               |
| NCT036<br>57576 | Trial of C134 in Patients With Recurrent GBM                                                                                             | Not yet recruiting     | Glioblastoma Multiforme of Brain, Anaplastic Astrocytoma of Brain, Gliosarcoma of Brain                       | Phase 1   | May 1, 2022       | United States |
| NCT020<br>45602 | Phase I Dose Escalation Study of Intravenous VCN-01 With or Without Gemcitabine and Abraxane® in Patients With Advanced Solid Tumors     | Active, not recruiting | Locally Advanced Solid Tumors, Metastatic Solid Tumors, Pancreatic Adenocarcinoma                             | Phase 1   | May 1, 2019       | Spain         |

|                 |                                                                                                                                              |                        |                                                                  |           |                  |               |
|-----------------|----------------------------------------------------------------------------------------------------------------------------------------------|------------------------|------------------------------------------------------------------|-----------|------------------|---------------|
| NCT027<br>59588 | GL-ONC1 Oncolytic Immunotherapy in Patients With Recurrent or Refractory Ovarian Cancer                                                      | Recruiting             | Ovarian Cancer, Peritoneal Carcinomatosis, Fallopian Tube Cancer | Phase 1/2 | December 1, 2019 | United States |
| NCT025<br>62755 | Hepatocellular Carcinoma Study Comparing Vaccinia Virus Based Immunotherapy Plus Sorafenib vs Sorafenib Alone                                | Recruiting             | Hepatocellular Carcinoma (HCC)                                   | Phase 3   | December 1, 2020 | United States |
| NCT020<br>45589 | A Phase I Dose Escalation Study of Intratumoral VCN-01 Injections With Gemcitabine and Abraxane® in Patients With Advanced Pancreatic Cancer | Completed              | Pancreatic Adenocarcinoma, Metastatic Pancreatic Adenocarcinoma  | Phase 1   | October 1, 2016  | Spain         |
| NCT015<br>84284 | Safety Study of Attenuated Vaccinia Virus (GL-ONC1) With Combination Therapy in Head & Neck Cancer                                           | Completed              | Cancer of Head and Neck                                          | Phase 1   | June 1, 2015     | United States |
| NCT006<br>25456 | Safety Study of Recombinant Vaccinia Virus to Treat Refractory Solid Tumors                                                                  | Completed              | Melanoma, Lung Cancer, Renal Cell Carcinoma                      | Phase 1   | April 1, 2010    | International |
| NCT003<br>14925 | Safety Study of Seneca Valley Virus in Patients With Solid Tumors With Neuroendocrine Features                                               | Unknown status         | Carcinoid, Neuroendocrine                                        | Phase 1   | December 1, 2008 | International |
| NCT028<br>79760 | Oncolytic MG1-MAGEA3 With Ad-MAGEA3 Vaccine in Combination With Pembrolizumab for Non-Small Cell Lung Cancer Patients                        | Active, not recruiting | Non-Small Cell Lung Cancer                                       | Phase 1/2 | January 1, 2020  | Canada        |
| NCT039<br>11388 | HSV G207 in Children With Recurrent or Refractory Cerebellar Brain Tumors                                                                    | Not yet recruiting     | Brain Neoplasms, Glioblastoma Multiforme,                        | Phase 1   | July 1, 2022     | United States |

|              |                                                                                                                                                                                |            |                                                                    |           |                  |                    |
|--------------|--------------------------------------------------------------------------------------------------------------------------------------------------------------------------------|------------|--------------------------------------------------------------------|-----------|------------------|--------------------|
|              |                                                                                                                                                                                |            | Glioblastoma of Cerebellum                                         |           |                  |                    |
| NCT006 29759 | A Study of Recombinant Vaccinia Virus to Evaluate the Safety and Efficacy of a Transdermal Injection Within the Tumor of Patients With Primary or Metastatic Hepatic Carcinoma | Completed  | Neoplasms, Liver                                                   | Phase 1   | July 1, 2007     | Korea, Republic of |
| NCT011 69584 | Safety Study of Recombinant Vaccinia Virus to Treat Refractory Solid Tumors in Pediatric Patients                                                                              | Completed  | Neuroblastoma, Rhabdomyosarcoma, Lymphoma, Wilm's Tumor            | Phase 1   | March 1, 2012    | United States      |
| NCT013 87555 | A Phase 2b Study of Modified Vaccinia Virus to Treat Patients Advanced Liver Cancer Who Failed Sorafenib                                                                       | Completed  | Hepatocellular Carcinoma, Liver Cancer, HCC                        | Phase 2   | December 1, 2011 | International      |
| NCT005 54372 | A Study of Recombinant Vaccinia Virus to Treat Unresectable Primary Hepatocellular Carcinoma                                                                                   | Completed  | Carcinoma, Hepatocellular                                          | Phase 2   | December 1, 2011 | International      |
| NCT013 94939 | Recombinant Vaccinia Virus Administered Intravenously in Patients With Metastatic, Refractory Colorectal Carcinoma                                                             | Completed  | Colorectal Carcinoma, CRC                                          | Phase 1/2 | June 1, 2015     | International      |
| NCT026 20423 | Study of Pembrolizumab With REOLYSIN® and Chemotherapy in Patients With Advanced Pancreatic Adenocarcinoma                                                                     | Completed  | Pancreatic Adenocarcinoma                                          | Phase 1   | March 1, 2018    | United States      |
| NCT024 57845 | HSV G207 Alone or With a Single Radiation Dose in Children With Progressive or Recurrent Supratentorial Brain Tumors                                                           | Recruiting | Malignant Supratentorial Neoplasms, Malignant Glioma, Glioblastoma | Phase 1   | April 1, 2020    | United States      |



|             |                                                                                                                                        |                        |                                                                                                                      |           |                   |               |
|-------------|----------------------------------------------------------------------------------------------------------------------------------------|------------------------|----------------------------------------------------------------------------------------------------------------------|-----------|-------------------|---------------|
| NCT00861627 | Phase 2 Study of REOLYSIN® in Combination With Paclitaxel and Carboplatin for Non-Small Cell Lung Cancer With KRAS or EGFR Activation  | Completed              | Carcinoma, Non-small Cell Lung                                                                                       | Phase 2   | September 1, 2015 | United States |
| NCT01274624 | Study of REOLYSIN® in Combination With FOLFIRI and Bevacizumab in FOLFIRI Naive Patients With KRAS Mutant Metastatic Colorectal Cancer | Completed              | KRAS Mutant Metastatic Colorectal Cancer                                                                             | Phase 1   | February 1, 2018  | United States |
| NCT02192775 | UARK 2014-21 A Phase II Trial of Oncolytic Virotherapy by Systemic Administration of Edmonston Strain of Measles Virus                 | Recruiting             | Multiple Myeloma                                                                                                     | Phase 2   | August 1, 2019    | United States |
| NCT02288897 | PV-10 vs Chemotherapy or Oncolytic Viral Therapy for Treatment of Locally Advanced Cutaneous Melanoma                                  | Active, not recruiting | Cutaneous Melanoma                                                                                                   | Phase 3   | March 1, 2019     | International |
| NCT03852511 | First in Human Study of NG-350A (an Oncolytic Adenoviral Vector Which Expresses an Anti-CD40 Antibody)                                 | Recruiting             | Metastatic Cancer, Epithelial Tumor                                                                                  | Phase 1   | June 1, 2021      | United States |
| NCT02364713 | MV-NIS or Investigator's Choice Chemotherapy in Treating Patients With Ovarian, Fallopian, or Peritoneal Cancer                        | Recruiting             | Fallopian Tube Transitional Cell Carcinoma, Malignant Ovarian Clear Cell Tumor, Malignant Ovarian Endometrioid Tumor | Phase 2   | February 1, 2025  | United States |
| NCT03225989 | Trial Investigating an Immunostimulatory Oncolytic Adenovirus for Cancer                                                               | Recruiting             | Pancreatic Adenocarcinoma, Ovarian Cancer, Biliary Carcinoma                                                         | Phase 1/2 | December 31, 2020 | Sweden        |

|                 |                                                                                                                                |                        |                                                                                                         |           |                   |               |
|-----------------|--------------------------------------------------------------------------------------------------------------------------------|------------------------|---------------------------------------------------------------------------------------------------------|-----------|-------------------|---------------|
| NCT020<br>68794 | MV-NIS Infected Mesenchymal Stem Cells in Treating Patients With Recurrent Ovarian Cancer                                      | Recruiting             | Malignant Ovarian Brenner Tumor, Ovarian Clear Cell Adenocarcinoma, Ovarian Endometrioid Adenocarcinoma | Phase 1/2 | March 10, 2021    | United States |
| NCT015<br>03177 | Intraleural Measles Virus Therapy in Patients With Malignant Pleural Mesothelioma                                              | Active, not recruiting | Recurrent Malignant Mesothelioma, Stage IA Malignant Mesothelioma, Stage IB Malignant Mesothelioma      | Phase 1   | December 1, 2019  | United States |
| NCT038<br>96568 | Oncolytic Adenovirus DNX-2401 in Treating Patients With Recurrent High-Grade Glioma                                            | Recruiting             | IDH1 wt Allele, Recurrent Anaplastic Astrocytoma, Recurrent Glioblastoma                                | Phase 1   | February 28, 2020 | United States |
| NCT032<br>59425 | Neoadjuvant Trial of Nivolumab in Combination With HF10 Oncolytic Viral Therapy in Resectable Stage IIIB, IIIC, IVM1a Melanoma | Recruiting             | Melanoma                                                                                                | Phase 2   | October 1, 2022   | United States |
| NCT019<br>56734 | Virus DNX2401 and Temozolomide in Recurrent Glioblastoma                                                                       | Completed              | Glioblastoma Multiforme, Recurrent Tumor                                                                | Phase 1   | December 1, 2015  | Spain         |
| NCT031<br>78032 | Oncolytic Adenovirus, DNX-2401, for Naive Diffuse Intrinsic Pontine Gliomas                                                    | Recruiting             | Brainstem Glioma, Neoadjuvant Therapy                                                                   | Phase 1   | August 30, 2019   | Spain         |
| NCT004<br>50814 | Vaccine Therapy With or Without Cyclophosphamide in Treating Patients With Recurrent or Refractory Multiple Myeloma            | Active, not recruiting | Recurrent Plasma Cell Myeloma, Refractory Plasma Cell Myeloma                                           | Phase 1/2 | July 10, 2018     | United States |

|                 |                                                                                                                                                                                                                                   |                        |                                                                                                         |         |                   |               |
|-----------------|-----------------------------------------------------------------------------------------------------------------------------------------------------------------------------------------------------------------------------------|------------------------|---------------------------------------------------------------------------------------------------------|---------|-------------------|---------------|
| NCT030<br>43391 | Phase 1b Study PVSRIPO for Recurrent Malignant Glioma in Children                                                                                                                                                                 | Recruiting             | Malignant Glioma, Anaplastic Astrocytoma, Anaplastic Oligoastrocytoma                                   | Phase 1 | July 1, 2020      | United States |
| NCT030<br>72134 | Neural Stem Cell Based Virotherapy of Newly Diagnosed Malignant Glioma                                                                                                                                                            | Recruiting             | Glioma, Anaplastic Astrocytoma, Anaplastic Oligodendroglioma                                            | Phase 1 | March 30, 2019    | United States |
| NCT011<br>99263 | Paclitaxel With or Without Viral Therapy in Treating Patients With Recurrent or Persistent Ovarian Epithelial, Fallopian Tube, or Primary Peritoneal Cancer                                                                       | Active, not recruiting | Recurrent Fallopian Tube Carcinoma, Recurrent Ovarian Carcinoma, Recurrent Primary Peritoneal Carcinoma | Phase 2 | September 1, 2019 | United States |
| NCT032<br>94083 | A Study of Recombinant Vaccinia Virus in Combination With REGN2810 for Renal Cell Carcinoma                                                                                                                                       | Recruiting             | Renal Cell Carcinoma                                                                                    | Phase 1 | November 1, 2019  | International |
| NCT030<br>03676 | A Pilot Study of Sequential ONCOS-102, an Engineered Oncolytic Adenovirus Expressing GMCSF, and Pembrolizumab in Patients With Advanced or Unresectable Melanoma Progressing After Programmed Cell Death Protein 1 (PD1) Blockade | Recruiting             | Advanced or Unresectable Melanoma Progressing After PD1 Blockade                                        | Phase 1 | June 1, 2020      | United States |

Supplemental Table 1: List of Oncolytic virus trials on ClinicalTrials.gov as of June 03, 2019. <sup>1</sup>The first three indications listed on ClinicalTrials.gov are included.
